# Supplementary material
Source: publisher figshare collection journal article supplement (https://acs.figshare.com/ndownloader/files/4768561)
Supplement: Supplementary file 1 [file 4768561]

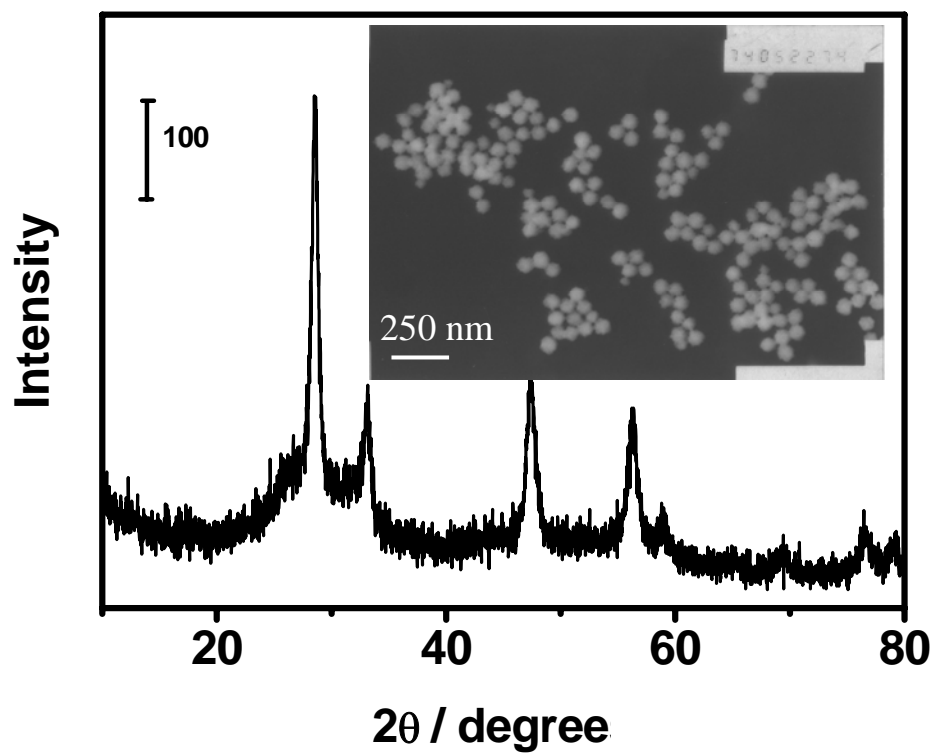

Figure 1. XRD pattern of the ~50 nm single dispersed ceria particles synthesized via hydrothermal process, which are cubic  $\text{CeO}_2$ . Inset shows their morphology observed by TEM.

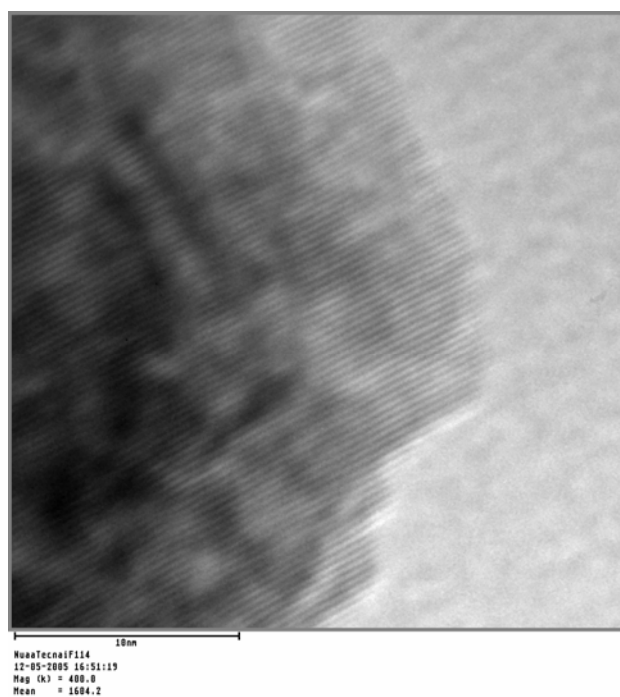

Figure 2. HRTEM image of one  $\text{CeO}_2$  nanoparticle. The crystalline strips correspond to  $\text{CeO}_2$   $\langle 111 \rangle$  planes with interval of 0.318 nm.

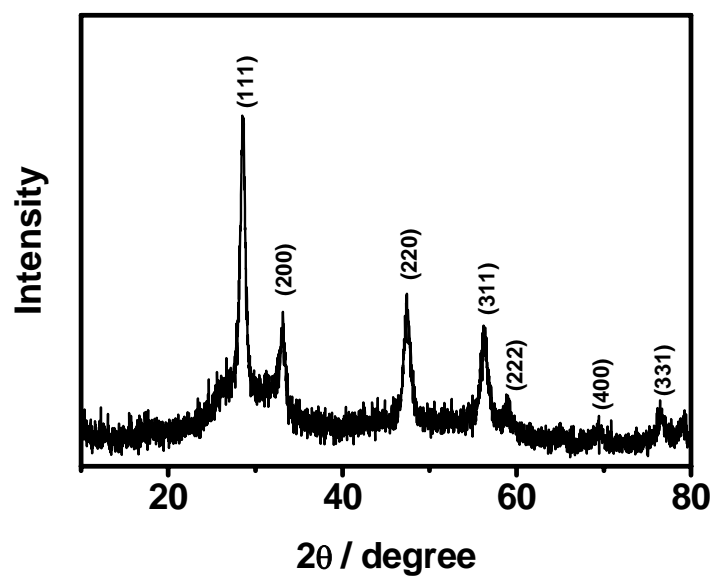

Figure 3. XRD profile of as-prepared titania nanotubes with ceria nanoparticle seeds, only diffraction peaks attributed to crystalline ceria are observed, indicating the titania is amorphous.
